# Supplementary material for: Optimal synthetic conditions for a novel and high performance Ni-rich cathode material of LiNi0.68Co0.10Mn0.22O2
Source: Royal Society of Chemistry journal article supplement (doi:10.1039/c8se00192h), 2018-01-01
Supplement: c8se00192h1.pdf [file c8se00192h1.pdf]

## Supplementary Information

### **Optimal synthetic condition for a novel and high performance Ni-rich cathode material of $\text{LiNi}_{0.68}\text{Co}_{0.10}\text{Mn}_{0.22}\text{O}_2$**

Xing Li<sup>a,\*</sup>, Kangjia Zhang<sup>a</sup>, Siyuan Wang, Mingshan Wang<sup>a,\*</sup>, Fei Jiang<sup>a</sup>, Yang Liu<sup>a</sup>,

Yun Huang<sup>a</sup>, Jianming Zheng<sup>b,\*</sup>

<sup>a</sup>The Center of New Energy Materials and Technology, Southwest Petroleum University, Chengdu, Sichuan 610500, China

<sup>b</sup>Research Institute (RI), NingDe Amperex Technology Limited, Ningde, Fujian 352100, China

\*Corresponding authors. E-mail addresses: [lixing@swpu.edu.cn](mailto:lixing@swpu.edu.cn), [wangmingshan@swpu.edu.cn](mailto:wangmingshan@swpu.edu.cn), [ZhengJM@ATLBattery.com](mailto:ZhengJM@ATLBattery.com).

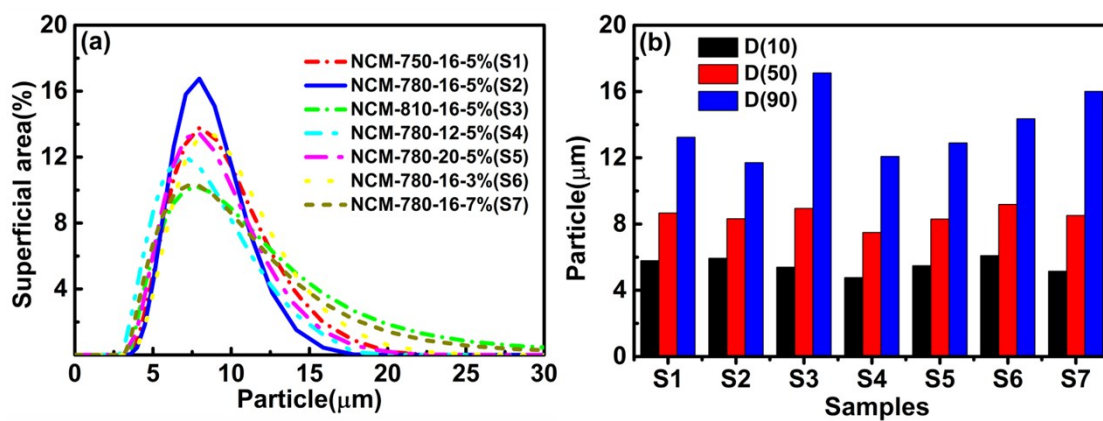

**Figure S1** Laser particle size analysis of the LiNi<sub>0.68</sub>Co<sub>0.10</sub>Mn<sub>0.22</sub>O<sub>2</sub> cathode materials synthesized under different conditions, (a) the normal distribution, and (b) the bar chart.

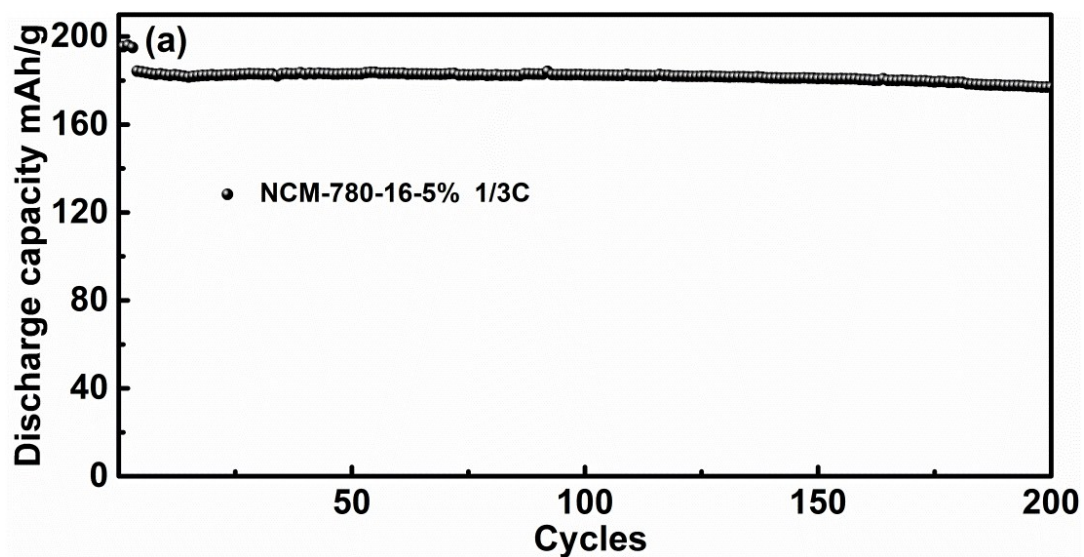

**Figure S2** Cycling stability of the LiNi<sub>0.68</sub>Co<sub>0.10</sub>Mn<sub>0.22</sub>O<sub>2</sub> cathode material synthesized with the optimized condition at the current rate of C/3. The electrode experienced the 3 formation cycles at C/10 before the long-term cycling testing.

---

**Table S1.** The I(003)/I(104) ratios of the  $\text{LiNi}_{0.68}\text{Co}_{0.10}\text{Mn}_{0.22}\text{O}_2$  products prepared at different calcining temperature (750 °C, 780 °C and 810 °C) with the fixed calcining time of 16 h and excess lithium (Li) amount of 5%.

| Samples       | I(003)/I(104) |
|---------------|---------------|
| NCM-750-16-5% | 1.206         |
| NCM-780-16-5% | 1.339         |
| NCM-810-16-5% | 1.318         |

**Table S2.** The I(003)/I(104) ratios of the  $\text{LiNi}_{0.68}\text{Co}_{0.10}\text{Mn}_{0.22}\text{O}_2$  products prepared at different calcining time (12 h, 16 h and 20 h) with the fixed calcining temperature of 780 °C and excess lithium (Li) amount of 5%.

| Samples       | I(003)/I(104) |
|---------------|---------------|
| NCM-780-12-5% | 1.212         |
| NCM-780-16-5% | 1.339         |
| NCM-780-20-5% | 1.346         |

**Table S3.** The I(003)/I(104) ratios of the  $\text{LiNi}_{0.68}\text{Co}_{0.10}\text{Mn}_{0.22}\text{O}_2$  products prepared with different excess Li amount (3%, 5% and 7%, molar percent) with the fixed calcining temperature of 780 °C and calcining time of 16 h.

| Samples       | I(003)/I(104) |
|---------------|---------------|
| NCM-780-16-3% | 1.151         |
| NCM-780-16-5% | 1.339         |
| NCM-780-16-7% | 1.247         |

**Table S4.** The initial Coulombic efficiency of the  $\text{LiNi}_{0.68}\text{Co}_{0.10}\text{Mn}_{0.22}\text{O}_2$  cathode materials synthesized under different conditions.

| Samples       | Initial Coulombic efficiency |
|---------------|------------------------------|
| NCM-750-16-5% | 81.1%                        |
| NCM-780-16-5% | 85.1%                        |
| NCM-810-16-5% | 85.7%                        |
| NCM-780-12-5% | 82.8%                        |
| NCM-780-20-5% | 81.5%                        |
| NCM-780-16-3% | 82.5%                        |
| NCM-780-16-7% | 82.8%                        |

**Table S5.** The calculated  $D_{\text{Li}^+}$  of the corresponding electrodes as shown in Figure S2.

| Sample            | NCM-780-16-5%                                     | NCM-810-16-5%                                     | NCM-780-20-5%                                     |
|-------------------|---------------------------------------------------|---------------------------------------------------|---------------------------------------------------|
| cycles            | $D_{\text{Li}^+}$ ( $\text{cm}^2 \text{s}^{-1}$ ) | $D_{\text{Li}^+}$ ( $\text{cm}^2 \text{s}^{-1}$ ) | $D_{\text{Li}^+}$ ( $\text{cm}^2 \text{s}^{-1}$ ) |
| 10 <sup>th</sup>  | $3.83 \times 10^{-8}$                             | $2.62 \times 10^{-8}$                             | $2.45 \times 10^{-8}$                             |
| 30 <sup>th</sup>  | $1.80 \times 10^{-8}$                             | $8.01 \times 10^{-9}$                             | $1.19 \times 10^{-8}$                             |
| 60 <sup>th</sup>  | $1.73 \times 10^{-8}$                             | $4.41 \times 10^{-9}$                             | $4.42 \times 10^{-9}$                             |
| 100 <sup>th</sup> | $1.51 \times 10^{-8}$                             | $7.32 \times 10^{-9}$                             | $9.78 \times 10^{-9}$                             |
